# Supplementary material
Source: MDPI journal article supplement (https://www.mdpi.com/1999-4907/12/11/1578)
Supplement: s1 [file s1]

# Supplemental Materials

**Table S1.** Results of soil microbial functional diversity (Shannon index) for descriptive statistics and Kolmogorov-Smirnov test.

| Shannon          | No. of samples | Min. | Max.  | Mean  | Standard variance | CV/%  | Skew  | Kurtosis | K-S test | Distribution type |
|------------------|----------------|------|-------|-------|-------------------|-------|-------|----------|----------|-------------------|
| Raw data         | 185            | 0.99 | 3.38  | 3.03  | 0.33              | 11.01 | -3.21 | 7.59     | 0.000    | #                 |
| Outliers removed | 179            | 2.03 | 3.38  | 3.04  | 0.27              | 9.04  | -2.26 | 5.44     | 0.000    | #                 |
| Box-Cox          | 185            | 6.63 | 88.15 | 55.10 | 17.30             | 31.40 | -1.03 | 1.06     | 0.164    | N                 |

Box-Cox, the raw data after Box-Cox transformation; #, non-normal distribution; N, Normal distribution; Shannon, Shannon index. CV, coefficient of variation; Skew, degree of skewed distribution; K-S test, Kolmogorov-Smirnov test. Outliers indicated the value of the variable was out of the range [3\*mean - standard error, 3\*mean + standard error].

**Table S2.** Semivariance analysis of spatial structure of soil microbial functional diversity.

|               | Model       | C <sub>0</sub> | Sill (C+C <sub>0</sub> ) | C <sub>0</sub> /(C+C <sub>0</sub> ) | R <sup>2</sup> | Rang (°) |
|---------------|-------------|----------------|--------------------------|-------------------------------------|----------------|----------|
| Shannon index | Exponential | 49.2           | 312.1                    | 0.16                                | 0.69           | 0.32     |

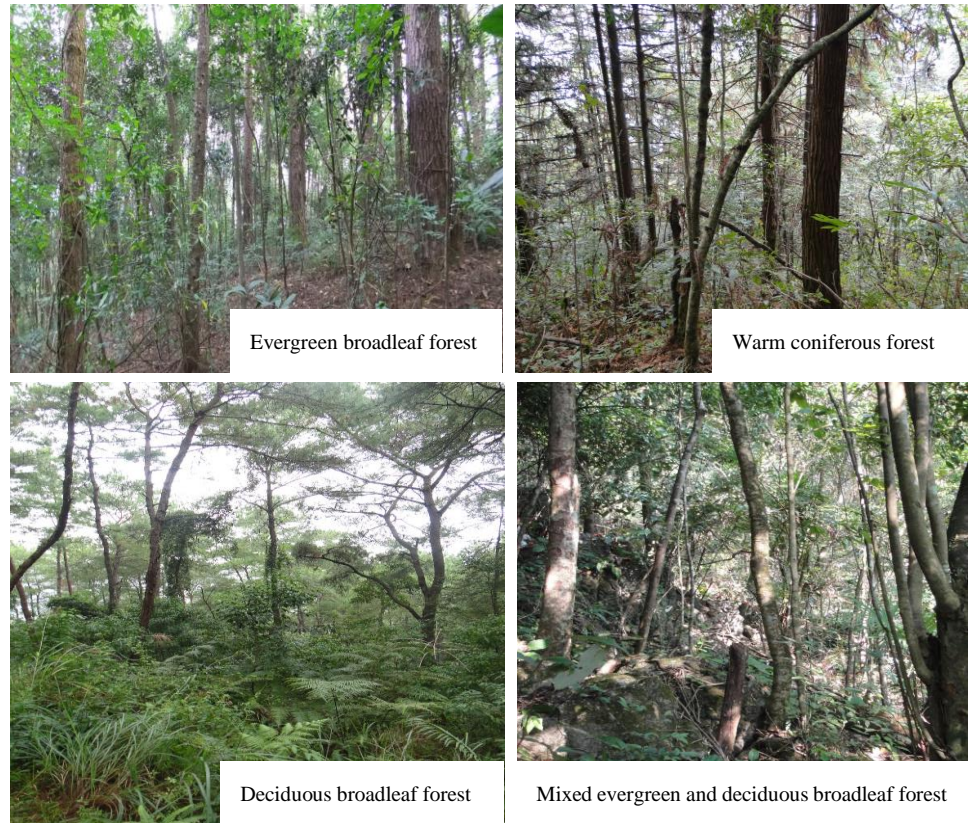

**Figure S1** Photos of sampling plots.

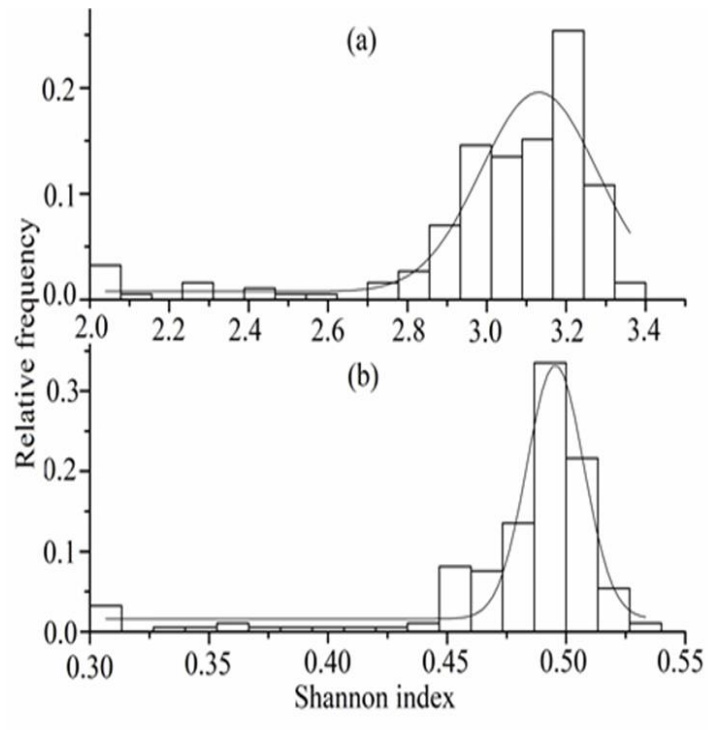

**Figure S2** Frequency distribution of Shannon-Wiener diversity index for the investigated forest soils. The curves correspond to simulation of normal distribution (a) with raw data or lognormal distribution (b) with the data after Box-Cox transformation.

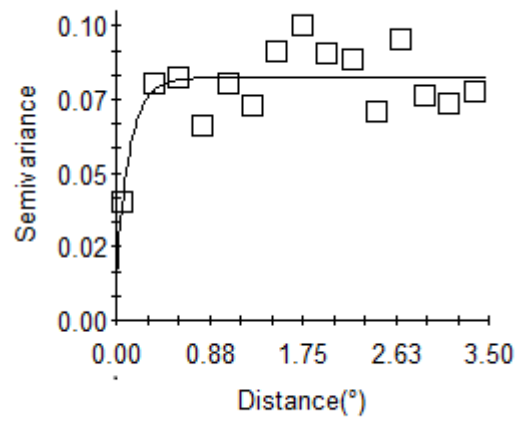

**Figure S3** Robust variograms ( $\square$ ) of microbial functional diversity for the investigated forest soils.

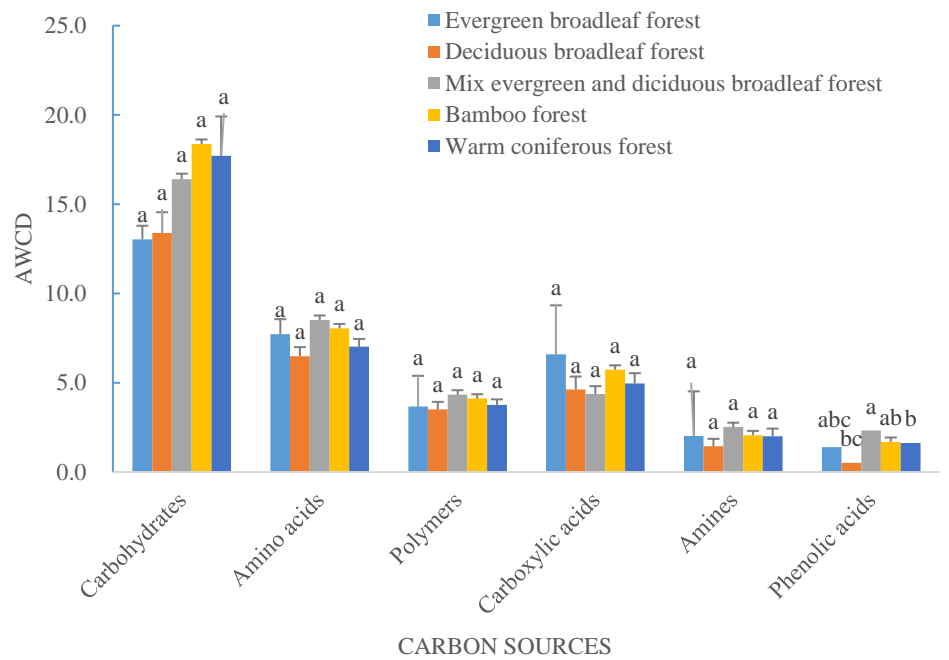

**Figure S4** Use efficiency of carbon sources by the soil microbial communities from the different forest types.

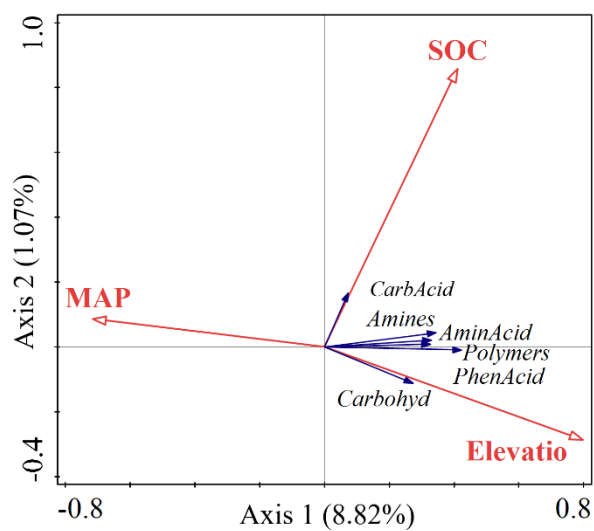

**Figure S5** Redundancy analysis (RDA) of carbon resources utilization and environmental factors in forest plots. Carbohyd, Carbohydrates; AminAcid, Amino acids; Polymers, Polymers; CarbAcid, Carboxylic acids; Amines, Amines; PhenAcid, Phenolic acids; MAP, Mean annual precipitation; Elevatio, Elevation; SOC, Soil organic carbon.
